# Supplementary material
Source: PubMed Central journal article supplement (PMC3715789)
Supplement: Supp_Fig1.pdf [file Supp_Fig1.pdf]

## Supplementary Data

**A**

| Left vs. Right Fold Change |        |         |         | Gene Title    | Gene Symbol |
|----------------------------|--------|---------|---------|---------------|-------------|
| WT #1                      | WT #2  | null #1 | null #2 |               |             |
| -2.14                      | -2.14  | -1.87   | -2.46   | homeo box A1  | Hoxa1       |
| -1.15                      | -1.23  | -2.00   | -2.46   | homeo box A2  | Hoxa2       |
| -2.46                      | -1.62  | -2.14   | -1.74   | homeo box A4  | Hoxa4       |
| -1.41                      | -5.28  | -2.14   | -1.62   | homeo box A5  | Hoxa5       |
| -11.31                     | -19.70 | -64.00  | -13.93  | homeo box A9  | Hoxa9       |
| -2.64                      | -1.87  | -4.29   | -4.92   | homeo box A10 | Hoxa10      |
| -1.62                      | -1.62  | -3.73   | -3.03   | homeo box A11 | Hoxa11      |
| 1.00                       | -1.41  | -1.52   | -2.83   | homeo box A13 | Hoxa13      |
| -2.14                      | -4.59  | -1.15   | -2.30   | homeo box B1  | Hoxb1       |
| -2.83                      | 1.52   | -1.62   | -1.74   | homeo box B3  | Hoxb3       |
| -1.15                      | -1.52  | -6.96   | -1.62   | homeo box B5  | Hoxb5       |
| -1.32                      | -2.14  | -8.00   | -4.29   | homeo box B6  | Hoxb6       |
| -1.15                      | -1.41  | -2.64   | -2.00   | homeo box B7  | Hoxb7       |
| -2.30                      | -1.07  | -4.59   | -2.83   | homeo box B8  | Hoxb8       |
| -1.07                      | -3.48  | -7.46   | -2.64   | homeo box C8  | Hoxc8       |
| 1.00                       | 1.23   | -2.46   | -1.74   | homeo box D1  | Hoxd1       |
| -1.52                      | -3.48  | -17.15  | -3.48   | homeo box D8  | Hoxd8       |

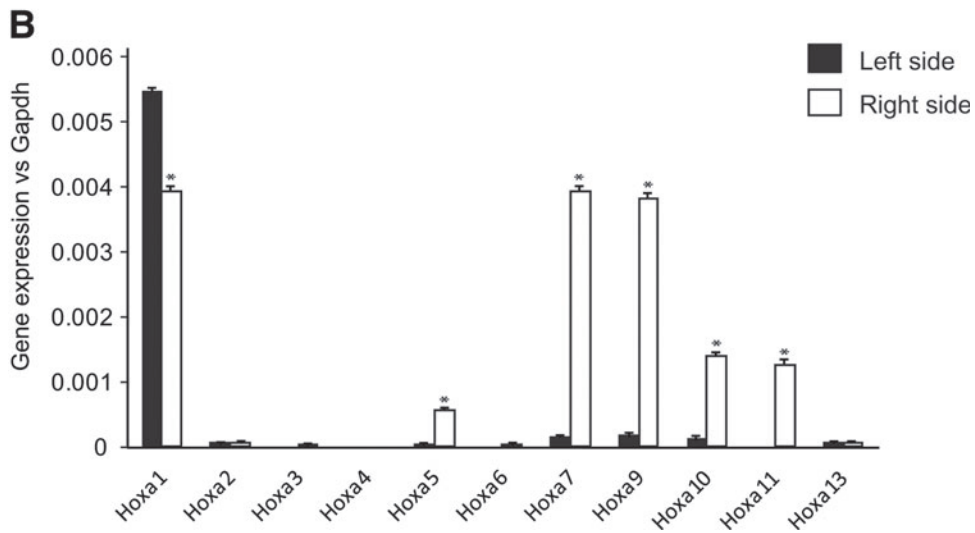

**SUPPLEMENTARY FIG. S1. (A)** *Hox* family transcriptome analysis of WT and *Nkx2-5* null left versus right side of the cardiac crescent. Significant left versus right differential transcript expression is denoted by a red highlight. **(B)** Quantitative reverse transcription (qRT)-polymerase chain reaction (PCR) of *Hox A* family transcripts in WT right (open bar) and left crescent (black bar). Gene expression is normalized to *Gapdh* expression; significant left versus right differential transcript expression is denoted by \* $P < 0.05$ ,  $n = 3$ .
