# Supplementary material
Source: PubMed Central journal article supplement (PMC3715789)
Supplement: Supp_Fig2.pdf [file Supp_Fig2.pdf]

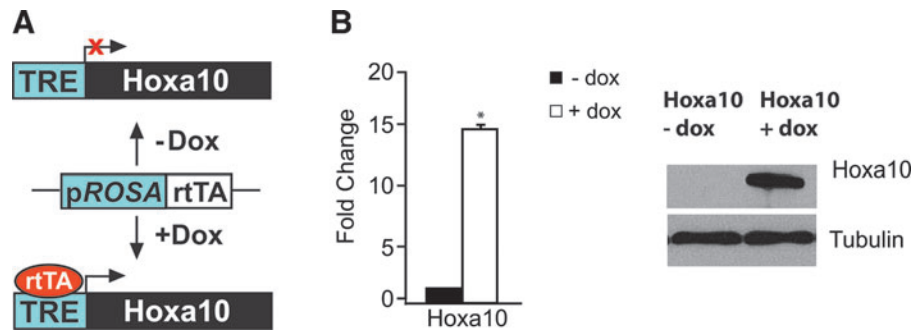

**SUPPLEMENTARY FIG. S2.** (A) Integration of *Hoxa10* expressing vector, pLox*Hoxa10*, into the X chromosome of the Ainv15 ES cells to place the cDNA of *Hoxa10* under the control of tetracycline responsive element (TRE). Upon addition of doxycycline (+Dox), reverse tetracycline transactivator (rtTA) binds to the TRE and induces *Hoxa10* expression. (B) Analyses of increase in the expression of the *Hoxa10* from ES cells using qRT-PCR and western analysis following the induction with doxycycline (Dox) for 24 h; \* $P < 0.05$ ,  $n = 3$ .
