# Supplementary material
Source: PubMed Central journal article supplement (PMC3715789)
Supplement: Supp_Fig3.pdf [file Supp_Fig3.pdf]

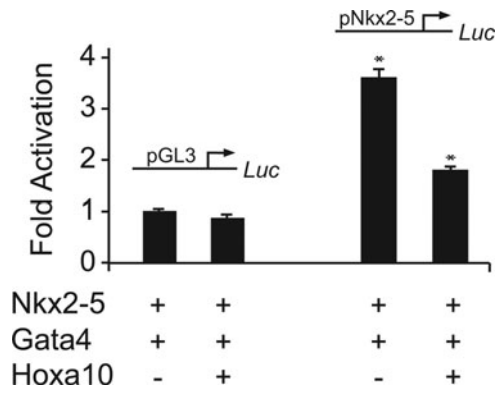

**SUPPLEMENTARY FIG. S3.** The *Nkx2-5* promoter was fused to the luciferase (*luc*) reporter gene and was transfected into Cos7 cells with and without the addition of the *Nkx2-5*, *Gata4*, or *Hoxa10* expressing plasmids. Empty pGL3 and *Nkx2-5* promoter-driven luciferase expression is shown. *Nkx2-5* promoter revealed a  $3.68 \pm 0.18$ -fold activation with *Nkx2-5* and *Gata4*, which was reduced to  $1.84 \pm 10$  with the addition of *Hoxa10*; \* $P < 0.05$ ,  $n = 3$ .
